# Supplementary material
Source: PubMed Central journal article supplement (PMC8727500)
Supplement: NIHMS1750158-supplement-Supplemental_Data_File__doc__pdf__etc___1.pdf [file NIHMS1750158-supplement-Supplemental_Data_File__doc__pdf__etc___1.pdf]

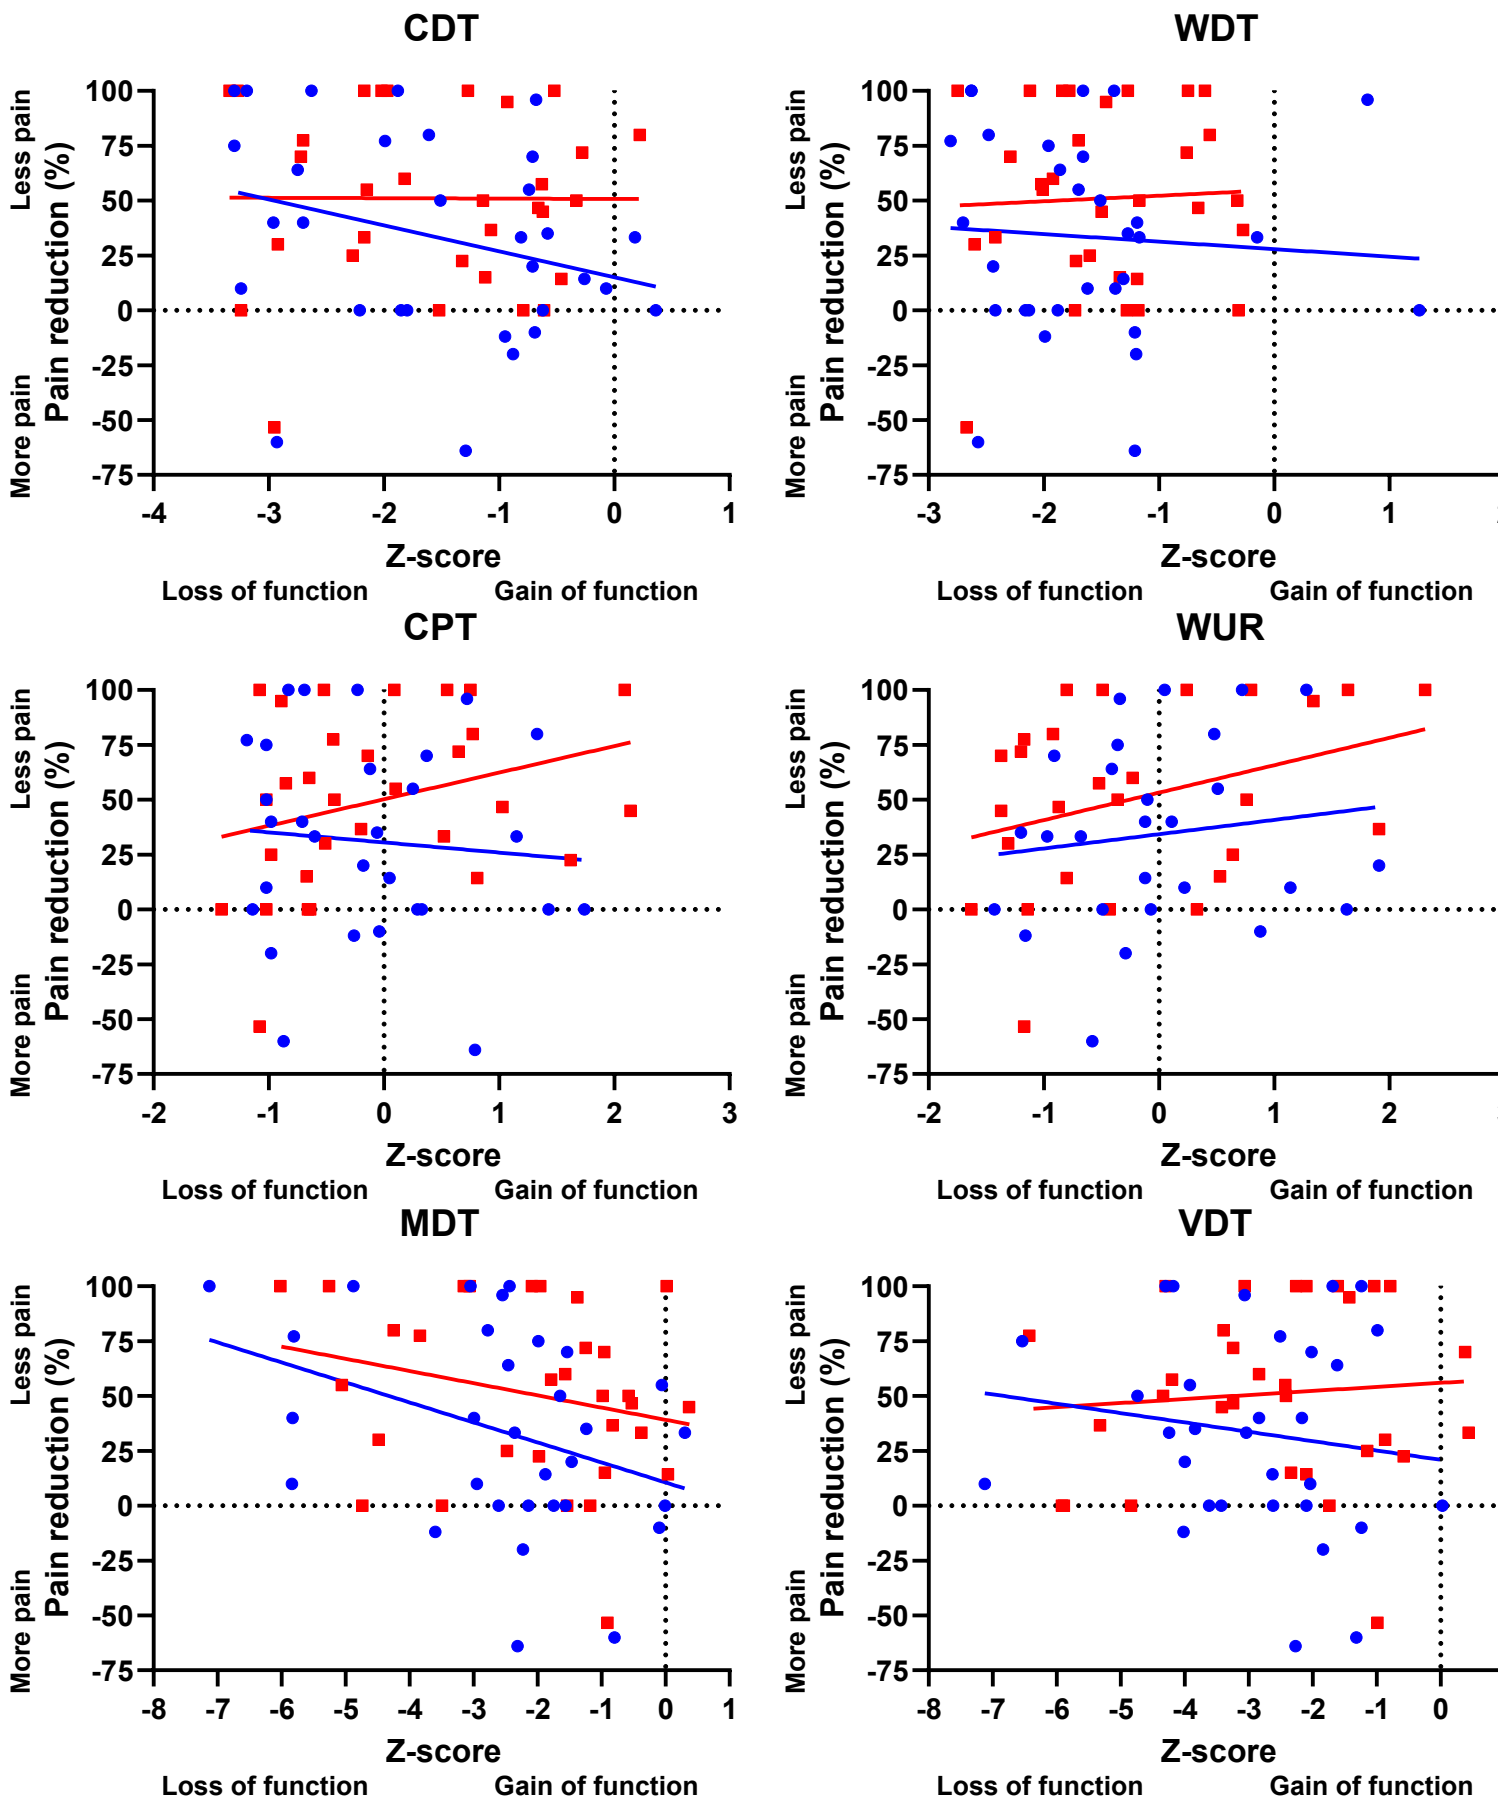

**Supplemental Digital Content Figure 1:** Percent pain reduction as a function of cold detection threshold (CDT), warm detection threshold (WDT), cold pain threshold (CPT), wind up ratio (WUR), mechanical detection ratio (MDT), and vibration detection threshold (VDT), as tested on the most painful foot prior to infusion. Blue circle indicates placebo session; red square indicates lidocaine session. Sample size and correlation coefficients can be found in Supplementary table 1.
