# Supplementary material
Source: PubMed Central journal article supplement (PMC8727500)
Supplement: NIHMS1750158-supplement-Supplemental_Data_File__doc__pdf__etc___2.pdf [file NIHMS1750158-supplement-Supplemental_Data_File__doc__pdf__etc___2.pdf]

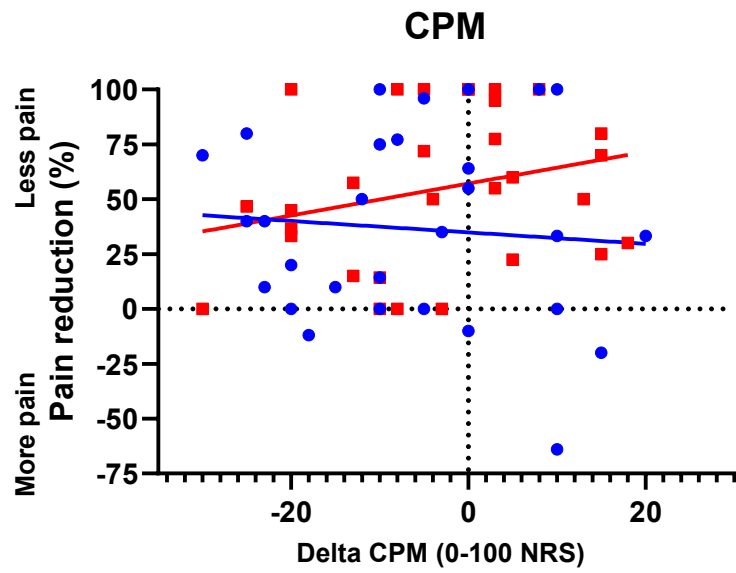

**Supplemental Digital Content Figure 2:** Percent pain reduction as a function of conditioned pain modulation (CPM). Delta CPM was calculated as perceived intensity of Pain-60 stimuli with and without contralateral cold conditioning. Blue circle indicates placebo session; red square indicates lidocaine session. Sample size and correlation coefficients can be found in Supplementary table 1.
