# Supplementary material
Source: PubMed Central journal article supplement (PMC8727500)
Supplement: NIHMS1750158-supplement-Supplemental_Data_File__doc__pdf__etc___3.pdf [file NIHMS1750158-supplement-Supplemental_Data_File__doc__pdf__etc___3.pdf]

| Quantitative sensory testing parameter | n  | Placebo             |         | Lidocaine           |         | Difference between two slopes |
|----------------------------------------|----|---------------------|---------|---------------------|---------|-------------------------------|
|                                        |    | Pearson correlation | P value | Pearson correlation | P value | P value                       |
| Cold detection threshold (CDT)         | 31 | -.29                | .11     | -.01                | .98     | .28                           |
| Warm detection threshold (WDT)         | 31 | -.07                | .71     | .05                 | .80     | .65                           |
| Cold pain threshold (CPT)              | 30 | -.09                | .65     | .3                  | .11     | .14                           |
| Wind up ratio (WUR)                    | 27 | .13                 | .51     | .34                 | .09     | .44                           |
| Mechanical detection threshold (MDT)   | 31 | -.36                | .05     | -.24                | .19     | .62                           |
| Vibration detection threshold (VDT)    | 31 | -.14                | .44     | .08                 | .65     | .41                           |
| Conditioned pain modulation (CPM)      | 30 | -.08                | .66     | .26                 | .17     | .20                           |

**Supplemental Digital Content Table 1:** Correlation coefficients of Supplementary Digital Content Figure 1 and 2.
