# Supplementary material
Source: PubMed Central journal article supplement (PMC8727500)
Supplement: NIHMS1750158-supplement-Supplemental_Data_File__doc__pdf__etc___4.pdf [file NIHMS1750158-supplement-Supplemental_Data_File__doc__pdf__etc___4.pdf]

|                                                                      | Non-Responders<br>(n = 24) | Responders<br>(n = 7) | P<br>value |
|----------------------------------------------------------------------|----------------------------|-----------------------|------------|
| Age, mean (SD)                                                       | 57.8 (10.8)                | 53.1 (12.0)           | .34        |
| Sex, F/M (% female)                                                  | 13/11 (54.2)               | 2/5 (28.6)            | .39        |
| Race                                                                 |                            |                       |            |
| Black (%)                                                            | 8 (33.3)                   | 1 (14.3)              | .64        |
| White (%)                                                            | 16 (66.7)                  | 6 (85.7)              |            |
| Hemoglobin A1c, mean (SD)                                            | 8.5 (2.1)                  | 7.6 (1.2)             | .30        |
| BMI in kg/m <sup>2</sup> , median (IQR)                              | 33.4 (27.1 – 38.4)         | 39.4 (29.4 – 46.9)    | .34        |
| Duration of painful symptoms prior to study (%)                      |                            |                       |            |
| Six months up to one year                                            | 4 (16.7)                   | 1 (14.3)              | .857       |
| More than one year up to two years                                   | 3 (12.5)                   | 0 (0.0)               |            |
| More than two years up to five years                                 | 6 (25.0)                   | 3 (42.9)              |            |
| Greater than five years                                              | 11 (45.8)                  | 3 (42.9)              |            |
| Pain frequency (%)                                                   |                            |                       |            |
| Constant                                                             | 23 (95.8)                  | 6 (85.7)              | .41        |
| Constant with intermittent exacerbations                             | 1 (4.2)                    | 0 (0.0)               |            |
| Intermittent                                                         | 0 (0.0)                    | 1 (14.3)              |            |
| Average pain intensity over the previous week 0-10 NRS, median (IQR) | 6.8 (5.0 – 7.8)            | 6 (5.0 – 7.0)         | .60        |
| Neuropathic Pain Symptom Inventory (NPSI) score, mean (SD)           |                            |                       |            |
| Burning                                                              | 5.4 (2.3)                  | 5.9 (2.5)             | .66        |
| Pressing                                                             | 4.9 (2.2)                  | 2.8 (1.5)             | .02        |
| Paroxysmal                                                           | 5.0 (2.5)                  | 6.1 (2.8)             | .32        |
| Evoked                                                               | 4.8 (2.5)                  | 4.0 (1.5)             | .44        |
| Paresthesia/dysesthesia                                              | 6.3 (3.2)                  | 6.5 (1.9)             | .88        |
| Total                                                                | 52.2 (16.8)                | 48.7 (13.9)           | .62        |
| Brief Pain Inventory (BPI), mean (SD)                                |                            |                       |            |
| Pain severity score                                                  | 5.9 (1.8)                  | 5.0 (1.9)             | .27        |
| Pain interference score                                              | 5.6 (2.3)                  | 5.6 (2.1)             | .97        |
| Hospital Anxiety and Depression Scale (HADS), mean (SD)              |                            |                       |            |
| Depression                                                           | 6.4 (4.4)                  | 6.0 (2.8)             | .83        |
| Anxiety                                                              | 7.2 (4.5)                  | 6.0 (1.3)             | .27        |
| Lidocaine Dosing                                                     |                            |                       |            |
| Total Lidocaine Administered (mg), mean (SD)                         | 331 (53)                   | 353 (43)              | .36        |
| Calculated Lidocaine C <sub>max</sub> (ng/ml), median (IQR)          | 3452 (2152 – 4386)         | 2539 (2274 – 3301)    | .38        |

**Supplemental Digital Content Table 2:** Participant demographic information divided by non-responders versus responders (>50% pain reduction at 60-120 minutes with lidocaine but not placebo).
